# Supplementary material
Source: PubMed Central journal article supplement (PMC1297691)

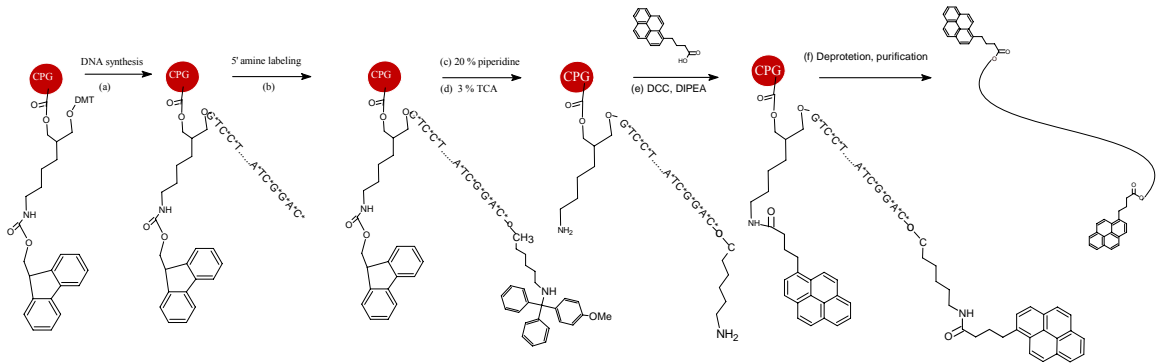

Supplement: pnas_0508821102_1.pdf [file pnas_0508821102_1.pdf]

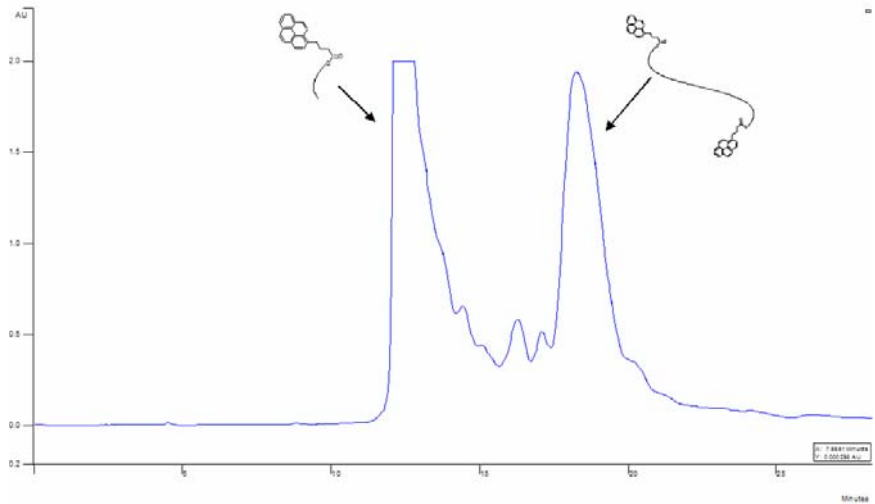

Supplement: pnas_0508821102_2.pdf [file pnas_0508821102_2.pdf]

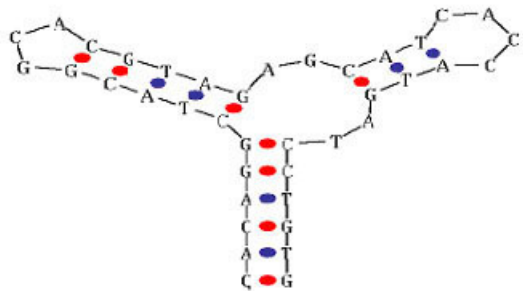

ES6

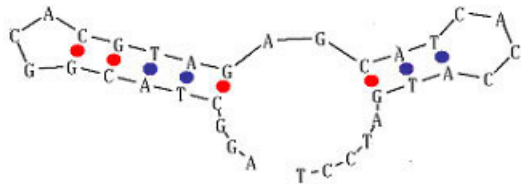

ES3

Supplement: pnas_0508821102_3.pdf [file pnas_0508821102_3.pdf]

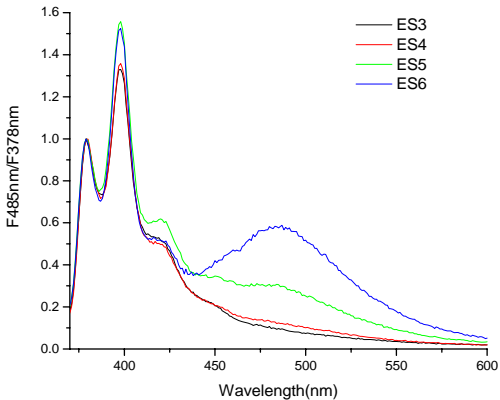

Supplement: pnas_0508821102_4.pdf [file pnas_0508821102_4.pdf]

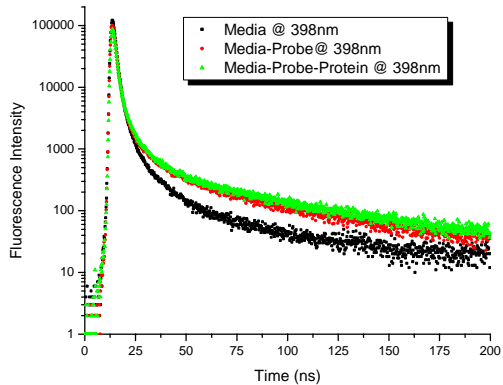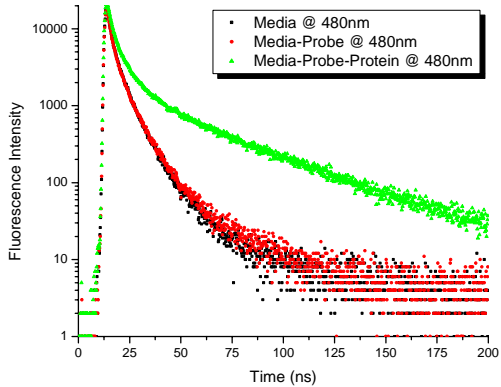

Supplement: pnas_0508821102_5.pdf [file pnas_0508821102_5.pdf]

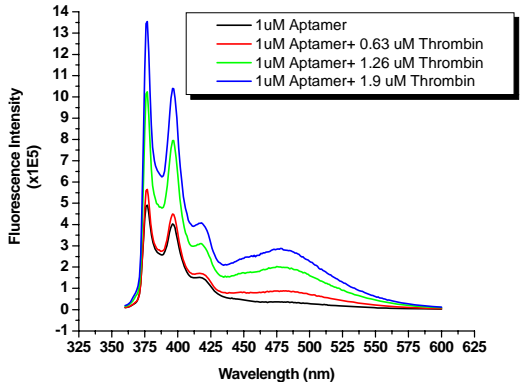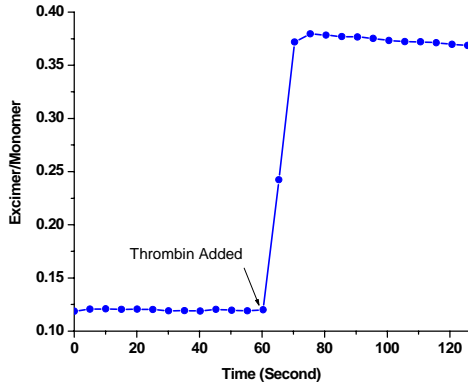

Supplement: pnas_0508821102_6.pdf [file pnas_0508821102_6.pdf]
